# Supplementary material for: Diagnostic Accuracy of Holotranscobalamin, Vitamin B12, Methylmalonic Acid, and Homocysteine in Detecting B12 Deficiency in a Large, Mixed Patient Population
Source: Hindawi journal article supplement (doi:10.1155/2020/7468506), 2020-02-07
Supplement: f1 [file 7468506.f1.pdf]

## **Supplementary materials to:**

# **Diagnostic accuracy of holotranscobalamin, vitamin B12, methylmalonic acid, and homocysteine in detecting B12 deficiency in a large, mixed patient population**

Running title: Markers of B12 deficiency in a mixed cohort

Araceli Jarquin Campos <sup>a,b</sup>, Lorenz Risch <sup>b,c,d</sup>, Urs Nydegger <sup>b</sup>, Jacobo Wiesner <sup>a</sup>, Maclovía Vazquez Van Dyck <sup>a</sup>, Harald Renz <sup>e</sup>, Zeno Stanga <sup>f,g</sup>, Martin Risch <sup>b,h</sup>

<sup>a</sup> Universidad Autónoma de Guadalajara, Facultad de Medicina, Zapopan, Jalisco, Mexico

<sup>b</sup> Labormedizinisches zentrum Dr. Risch, Vaduz, Liechtenstein

<sup>c</sup> Center of Laboratory Medicine, University Institute of Clinical Chemistry, University of Bern, Bern, Switzerland

<sup>d</sup> Private University of the Principality of Liechtenstein, Triesen, Liechtenstein

<sup>e</sup> Institute of Laboratory Medicine, Philipps University Marburg, Marburg, Germany

<sup>f</sup> Department for Diabetes, Endocrinology, Nutritional Medicine and Metabolism, Bern University Hospital and University of Bern, Bern, Switzerland

<sup>g</sup> Swiss Academy of Military and Disaster Medicine, Ittigen, Switzerland

<sup>h</sup> Zentrallabor, Kantonsspital Graubünden, Chur, Switzerland

Supplementary tables: 5

### **Correspondence:**

Martin Risch, MD  
Kantonsspital Graubünden  
Zentrallabor  
Loësstrasse 170  
7000 Chur  
Tel. + 41 81 256 65 31  
Fax + 41 81 256 65 28  
Email [martin.risch@ksgr.ch](mailto:martin.risch@ksgr.ch)

In the following tables we report on the results on a per patient analysis of the dataset. Only the data obtained at the occasion from the first blood drawing were taken for this analysis, which included a total of 9,464 patients.

**Table S1.** Baseline characteristics of the 9,464 patients. IQR=interquartile range for continuous variables; CI= confidence interval for proportion. Both are given in [brackets].

| Parameter (units)                                    | Median, IQR or 95%-CI    |
|------------------------------------------------------|--------------------------|
| Patient age (years)                                  | 54 [39,68]               |
| Female gender (n)                                    | 59.3% [58.3,60.3] (5616) |
| Holotranscobalamin (pmol)                            | 64 [45,93]               |
| B12 (pmol/L)                                         | 286 [217,381]            |
| MMA (nmol/L)                                         | 177 [137,237]            |
| Hcy (μmol/L)                                         | 12.2 [9.7,15.3]          |
| HoloTC/B12 (%)                                       | 21.6% [16,28.4]          |
| Haptocorrin-bound B12 (pmol/L)                       | 220 [160,300]            |
| 4cB12                                                | 0.23 [-0.12,0.58]        |
| -Elevated B12 (4cB12>1.5) (n)                        | 0.89% [0.72, 1.1] (84)   |
| - B12 adequacy (4cB12: -0.5 to 1.5) (n)              | 89.7% [89,90.3] (8486)   |
| - Low B12 (4cB12: -1.5 to -0.51) (n)                 | 8.9% [8.3,9.5] (841)     |
| - Possible B12 deficiency (4cB12: -1.51 to -2.5) (n) | 0.5% [0.37,0.66] (47)    |
| - Probable B12 deficiency (4cB12 < -2.5) (n)         | 0.06% [0.03;0.14] (6)    |

**Table S2.** Marker cut-offs for detecting subclinical B12 deficiency (4cB12  $\leq$ -0.5 and  $>$ -1.5) with a sensitivity or specificity of 99% at a given specificity and sensitivity, as well as the optimum decision point in 9,464 patients.

| Marker             | Cut-off 99% sensitivity | Corresponding specificity (%) | Cut-off 99% specificity | Corresponding sensitivity (%) | Optimum decision point | Corresponding Sensitivity/ Specificity (%) |
|--------------------|-------------------------|-------------------------------|-------------------------|-------------------------------|------------------------|--------------------------------------------|
| HoloTC (pmol/L)    | <72.4                   | 44.2                          | <24.8                   | 25.9                          | <45                    | 85.2 / 81                                  |
| B12 (pmol/L)       | <352                    | 34.4                          | <141                    | 27.6                          | <229                   | 87 / 76.6                                  |
| MMA (nmol/L)       | >153                    | 39.6                          | >485                    | 27.4                          | >238                   | 83.7 / 82                                  |
| Hcy ( $\mu$ mol/L) | >8                      | 12.6                          | >29.5                   | 11.1                          | >15                    | 67.9 / 77.3                                |

**Table S3.** Marker cut-offs for detecting possible or probable B12 deficiency (4cB12<sub>≤</sub>-1.5) with a sensitivity or specificity of 99% at a given specificity and sensitivity, as well as the optimum decision point in 9,464 patients.

| Marker          | Cut-off 99% sensitivity | Corresponding specificity (%) | Cut-off 99% specificity | Corresponding sensitivity (%) | Optimum decision point | Corresponding Sensitivity/ Specificity (%) |
|-----------------|-------------------------|-------------------------------|-------------------------|-------------------------------|------------------------|--------------------------------------------|
| HoloTC (pmol/L) | <38.5                   | 83.3                          | <19.5                   | 76                            | <27                    | 94 / 95.8                                  |
| B12 (pmol/L)    | <197                    | 82.8                          | <114                    | 56                            | <167                   | 96 / 91.7                                  |
| MMA (nmol/L)    | >157                    | 38.1                          | >736                    | 74                            | >532                   | 96 / 97.5                                  |
| Hcy (μmol/L)    | >6.1                    | 2.6                           | >34.2                   | 28                            | >16,4                  | 90 / 80.7                                  |

**Table S4.** Diagnostic accuracies of the different markers for detecting low B12 (4cB12 <-0.5 and >-1.5) in 9,464 men and women over or under 50 years. \* Significant difference between the AUC of B12 and HoloTC ( $p<0.05$ );<sup>†</sup> significant difference between HoloTC and MMA ( $p<0.05$ ); <sup>‡</sup> significant difference between Hcy and all other markers ( $p<0.01$ ); <sup>°</sup>significant difference between MMA and B12 ( $p<0.05$ ). The difference in the AUC of HoloTC and B12 ( $p=0.056$  in women) and HoloTC and MMA ( $p=0.087$  in men  $\geq 50$  years) was not significant in either subgroup.

| Marker                                | Women               | Men                 | <50<br>years        | $\geq 50$<br>years  | Women,<br><50 years | Women,<br>$\geq 50$ years | Men,<br><50 years  | Men,<br>$\geq 50$ years |
|---------------------------------------|---------------------|---------------------|---------------------|---------------------|---------------------|---------------------------|--------------------|-------------------------|
| (N whole group)<br>(n with low 4cB12) | (N=5589)<br>(n=475) | (N=3822)<br>(n=344) | (N=3876)<br>(n=244) | (N=5537)<br>(n=675) | (N=2630)<br>(n=171) | (N=3959)<br>(n=304)       | (N=1246)<br>(n=73) | (N=2576)<br>(n=271)     |
| HoloTC                                | 0.911               | 0.912               | 0.914               | 0.914 *             | 0.918               | 0.919 *                   | 0.914              | 0.909                   |
| B12                                   | 0.896               | 0.906               | 0.924               | 0.887               | 0.921               | 0.882                     | 0.931              | 0.894                   |
| MMA                                   | 0.915 °             | 0.9                 | 0.924               | 0.898 <sup>†</sup>  | 0.927               | 0.909 °                   | 0.916              | 0.889                   |
| Hcy                                   | 0.784 <sup>‡</sup>  | 0.825 <sup>‡</sup>  | 0.769 <sup>‡</sup>  | 0.80 <sup>‡</sup>   | 0.769 <sup>‡</sup>  | 0.799 <sup>‡</sup>        | 0.851 <sup>‡</sup> | 0.808 <sup>‡</sup>      |

**Table S5.** Diagnostic accuracies of the different markers for detecting potential or probable B12 deficiency (4cB12 <-1.5) in men and women over or under 50 years. \*

Significant difference between the AUC of B12 and HoloTC ( $p<0.05$ ); # significant

difference between Hcy and B12 and HoloTC ( $p<0.05$ ); ^ significant difference

between Hcy and B12 and MMA ( $p<0.05$ ) ; ‡ significant difference between Hcy and all

other markers ( $p<0.05$ ).

| Marker                                 | Women              | Men                | <50<br>years      | ≥50<br>years       | Women,<br><50 years | Women,<br>≥50 years | Men,<br><50 years | Men,<br>≥50 years  |
|----------------------------------------|--------------------|--------------------|-------------------|--------------------|---------------------|---------------------|-------------------|--------------------|
| (N whole group)<br>(n with 4cB12<-1.5) | (N=5616)<br>(n=26) | (N=3848)<br>(n=24) | (N=3884)<br>(n=5) | (N=5580)<br>(n=43) | (N=2634)<br>(n=4)   | (N=2982)<br>(n=22)  | (N=1250)<br>(n=3) | (N=2598)<br>(n=21) |
| HoloTC                                 | 0.993 *            | 0.98               | 0.971             | 0.99*              | 0.99                | 0.995 *             | 0.956             | 0.983              |
| B12                                    | 0.975              | 0.978              | 0.988             | 0.972              | 0.988               | 0.972               | 0.994             | 0.971              |
| MMA                                    | 0.973              | 0.989              | 0.998             | 0.972              | 1                   | 0.96                | 0.997             | 0.985              |
| Hcy                                    | 0.895 #            | 0.932 ‡            | 0.831             | 0.905 ‡            | 0.748               | 0.893 #             | 0.94 ^            | 0.924 ‡            |
